# Supplementary material for: Identification of both copy number variation-type and constant-type core elements in a large segmental duplication region of the mouse genome
Source: PubMed Central journal article supplement (PMC3722088; doi:10.1186/1471-2164-14-455), 2013-07-08
Supplement: 1471-2164-14-455-S9.pdf [file 1471-2164-14-455-S9.pdf]

**Additional file 9. Detection of large SD regions in higher magnification of the self-comparative-plots**

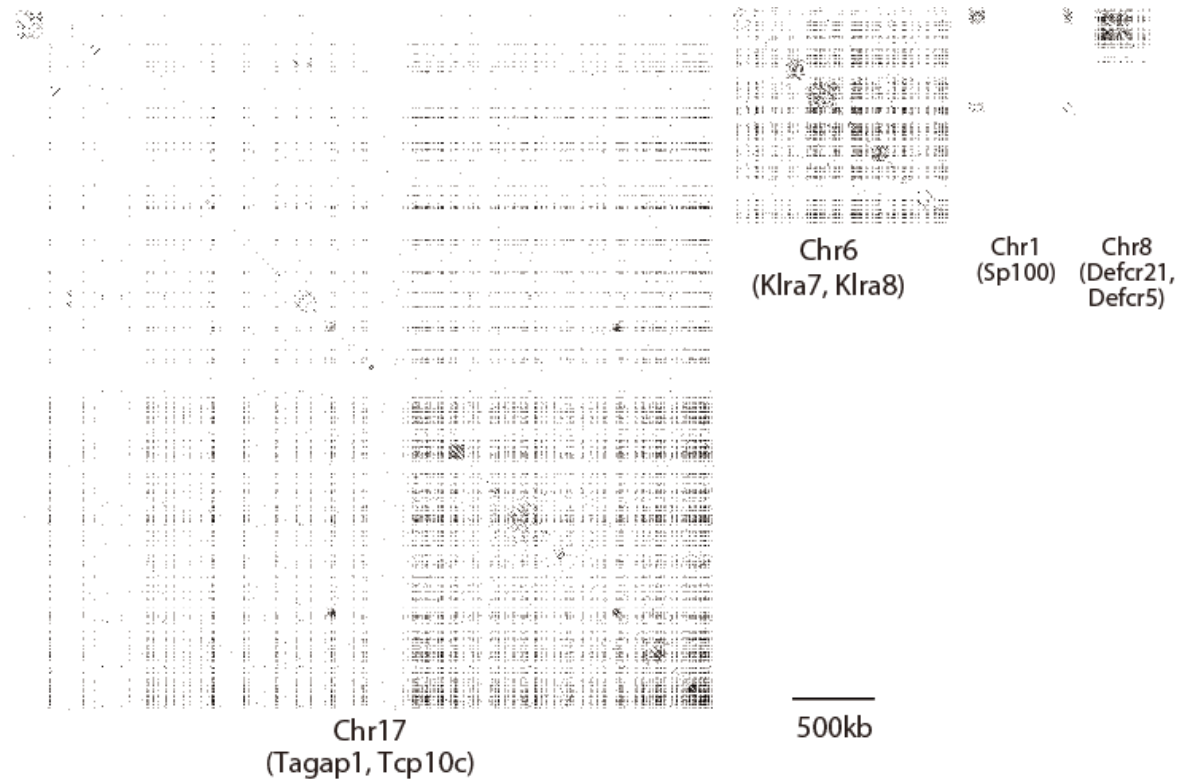

SD regions on Chrs 1, 6, 8, and 17, which have been reported previously (She et al. 2008), were not detected as dark square patches in self-comparative-plots of whole chromosomes in this study. However, these SD regions were detected in further magnification, indicating
